# Supplementary material
Source: PubMed Central journal article supplement (PMC3039362)
Supplement: supp_M110.158741_FigS1_Lee.pdf [file supp_M110.158741_FigS1_Lee.pdf]

**A**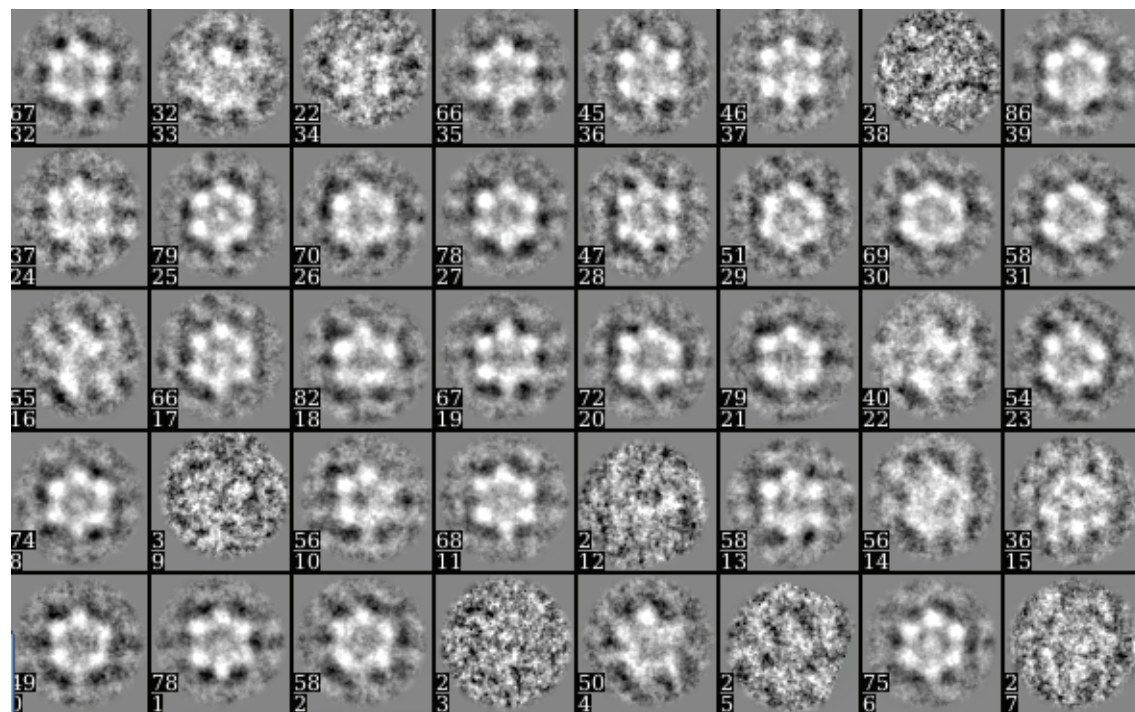**B**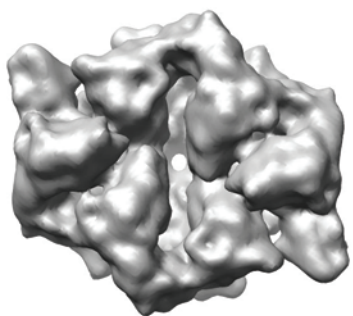ADP-FtsH<sub>cyt</sub>(2CEA)/2-fold**C**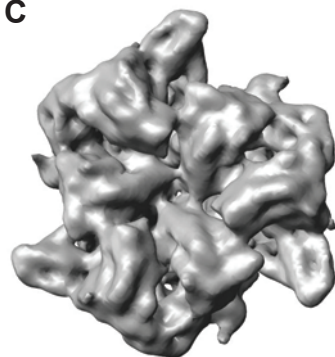ADP-FtsH<sub>cyt</sub>(2DHR)/3-fold**D**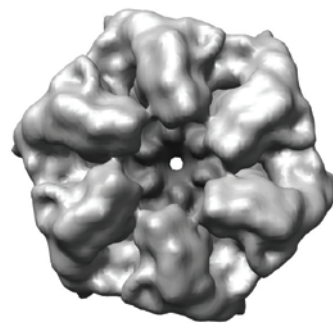apo-FtsH<sub>cyt</sub>(3KDS)/6-fold**E**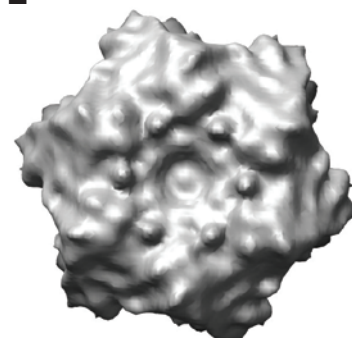ATP-*m*-AAA/6-fold
