# Supplementary material
Source: PubMed Central journal article supplement (PMC3039362)

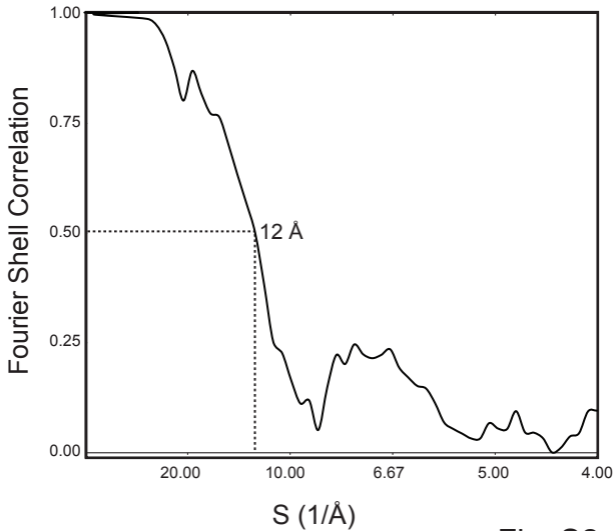

Fig. S2

Supplement: supp_M110.158741_FigS2_Lee.pdf [file supp_M110.158741_FigS2_Lee.pdf]

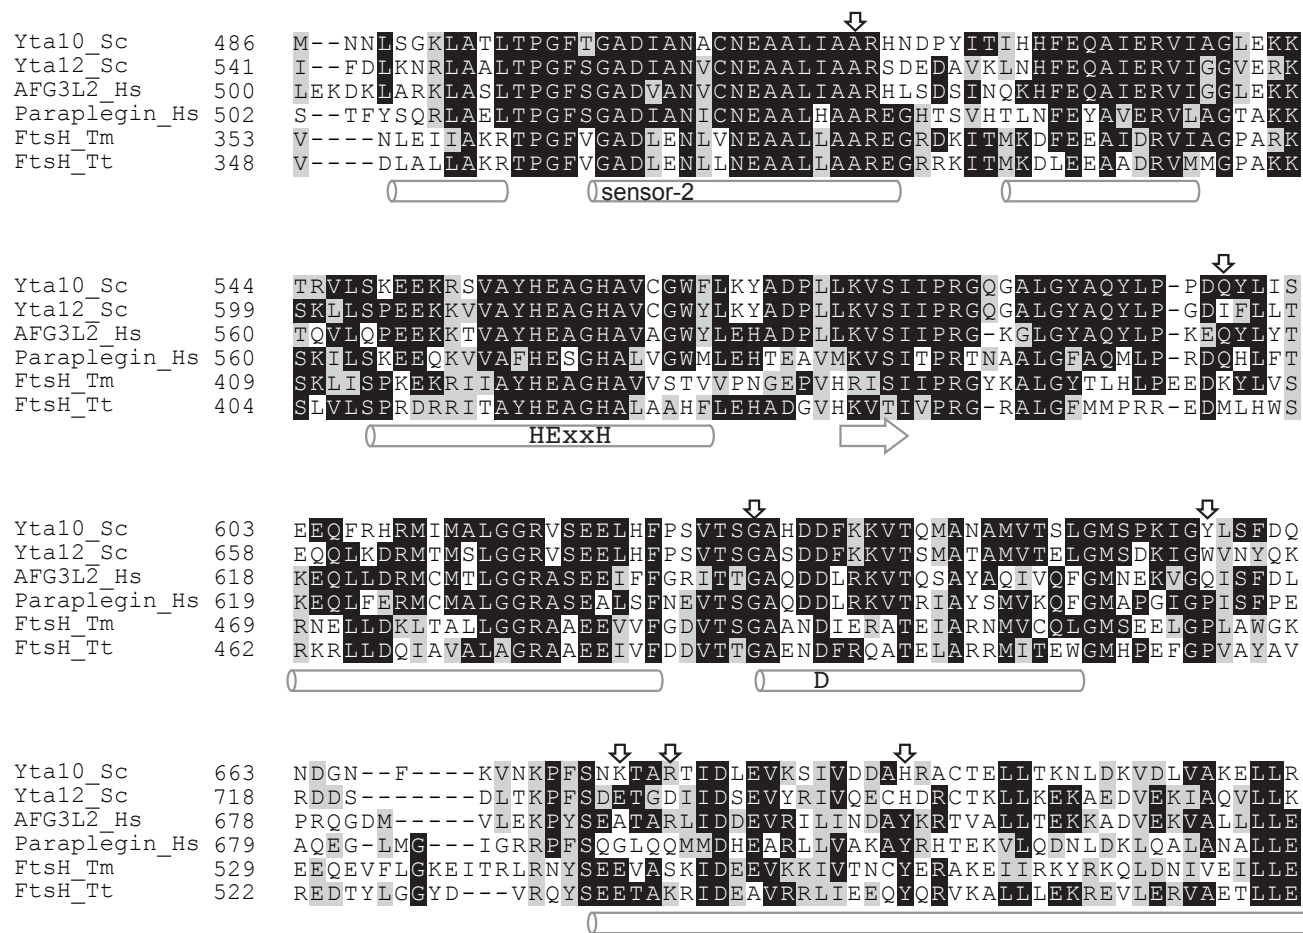

Fig. S3

Supplement: supp_M110.158741_FigS3_Lee.pdf [file supp_M110.158741_FigS3_Lee.pdf]

Yta10

Yta12

W

W

-

W

-

I653T

-

G685V

-

W712C

-

E730K

-

D733Y

-

D733G

-

H747R

-

A572V

-

H531Y

-

E730K/D733Y

W

W

-

W

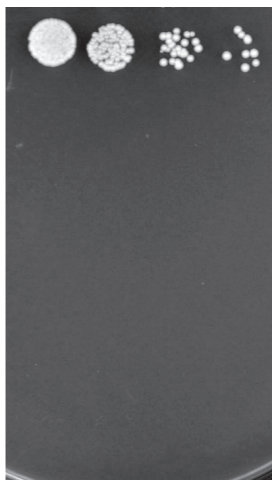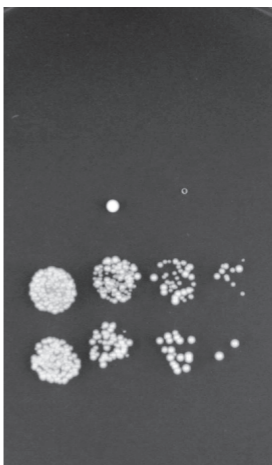

Fig. S4

Supplement: supp_M110.158741_FigS4_Lee.pdf [file supp_M110.158741_FigS4_Lee.pdf]
